# Supplementary material for: A DFT study of the effect of SO4 groups on the properties of TiO2 nanoparticles
Source: Royal Society of Chemistry journal article supplement (doi:10.1039/c6cp05681d), 2016-01-01
Supplement: c6cp05681d1.pdf [file c6cp05681d1.pdf]

## Supplementary information

### A DFT study of the effect of $\text{SO}_4$ groups on the properties of $\text{TiO}_2$ nanoparticles

Olga Miroshnichenko<sup>\*a,b</sup>, Sergei Posysaev<sup>a,b</sup>, Matti Alatalo<sup>a</sup>

<sup>a</sup> University of Oulu, Theoretical Physics Research Unit, PL 3000, FI-90014 Oulu, Finland;

<sup>b</sup> Peter the Great St. Petersburg Polytechnic University, Department of Theoretical Mechanics, Polytechnicheskaya 29, 195251 St. Petersburg, Russian Federation.

E-mail: olga.miroshnichenko@oulu.fi

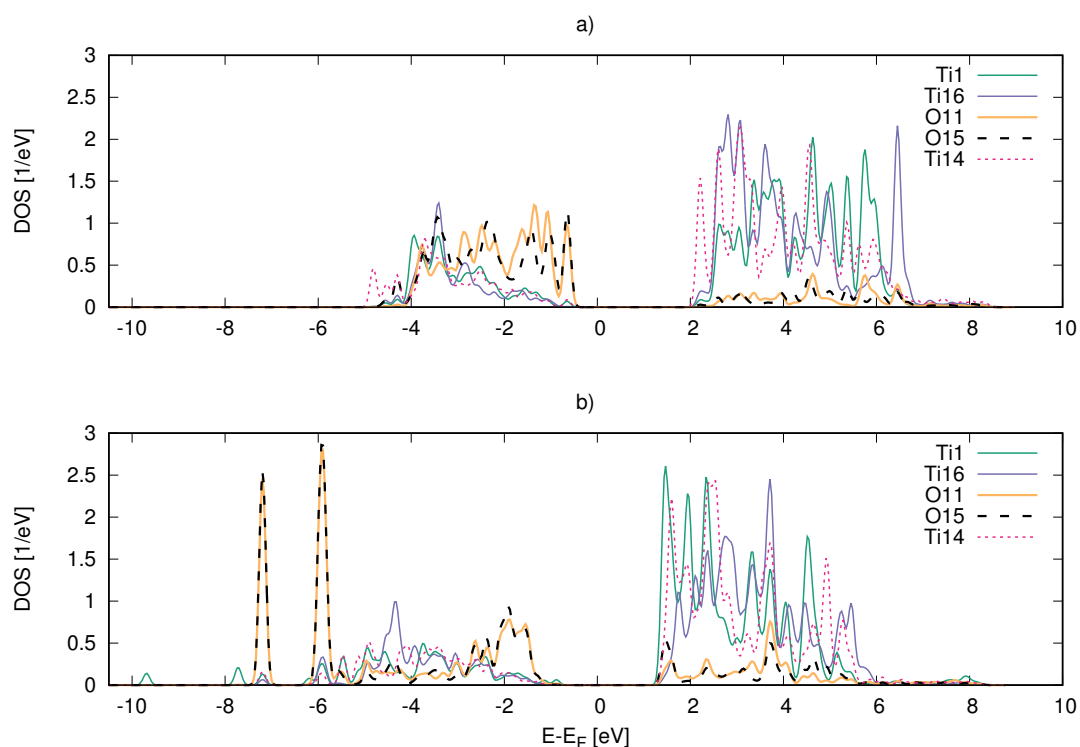

Figure S1: LDOS before (a) and after (b) the adsorption of 1  $\text{SO}_4$  group for the p-orbitals of O atoms, forming O-O bond and the d-orbitals of neighboring Ti atoms. The atoms are emphasized in Fig. 1 d.

Table S1: Detailed electronic states for  $\text{Ti}_{16}\text{O}_{32}$  with 1  $\text{SO}_4$

| state/eV | atom and orbital | comments                                                                  |
|----------|------------------|---------------------------------------------------------------------------|
| -9.681   | Ss               |                                                                           |
| -7.706   | Sp               |                                                                           |
| -7.204   | O11p-O15p        | O-O bond                                                                  |
| -6.199   | Sp               |                                                                           |
| -5.931   | O11p-O15p        | O-O bond                                                                  |
| -5.529   | Sp               |                                                                           |
| -0.880   | O25p, O26p       | HOMO level. Double bonded O atoms in the $\text{SO}_4$ group              |
| 1.448    | Ti1d             | LUMO level. One of the atoms to which the $\text{SO}_4$ group is attached |

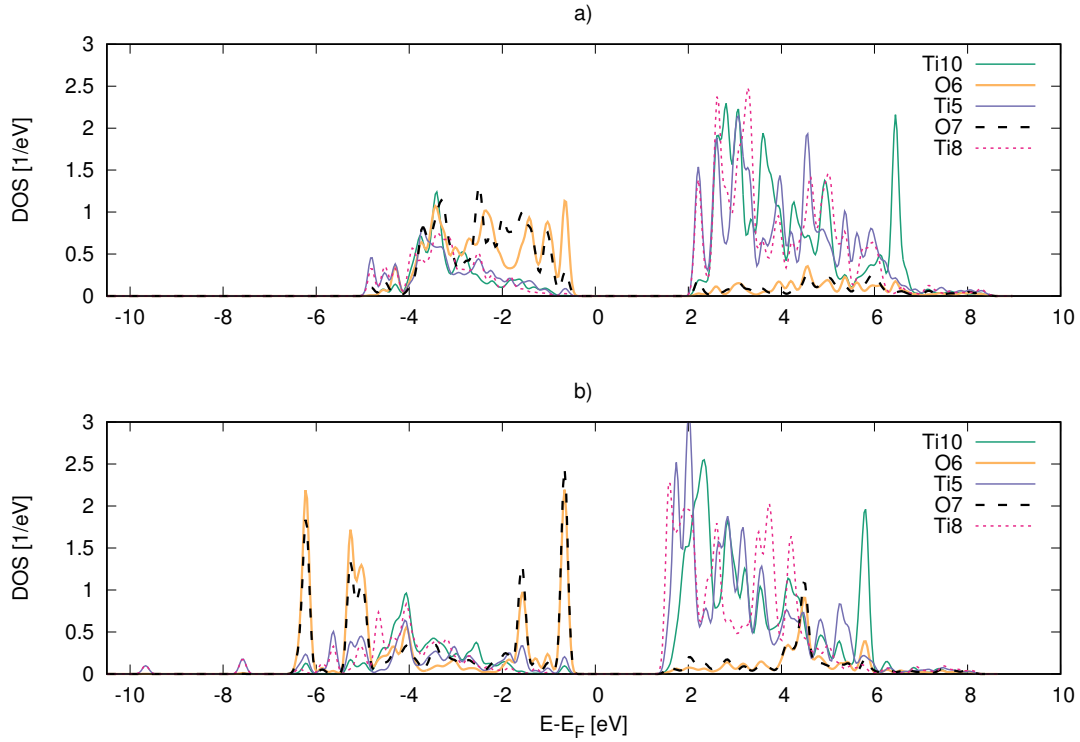

Figure S2: LDOS before (a) and after (b) the adsorption of 2  $\text{SO}_4$  groups for the p-orbitals of O atoms, forming O-O bond and the d-orbitals of neighboring Ti atoms. The atoms are emphasized in Fig. 1 e.

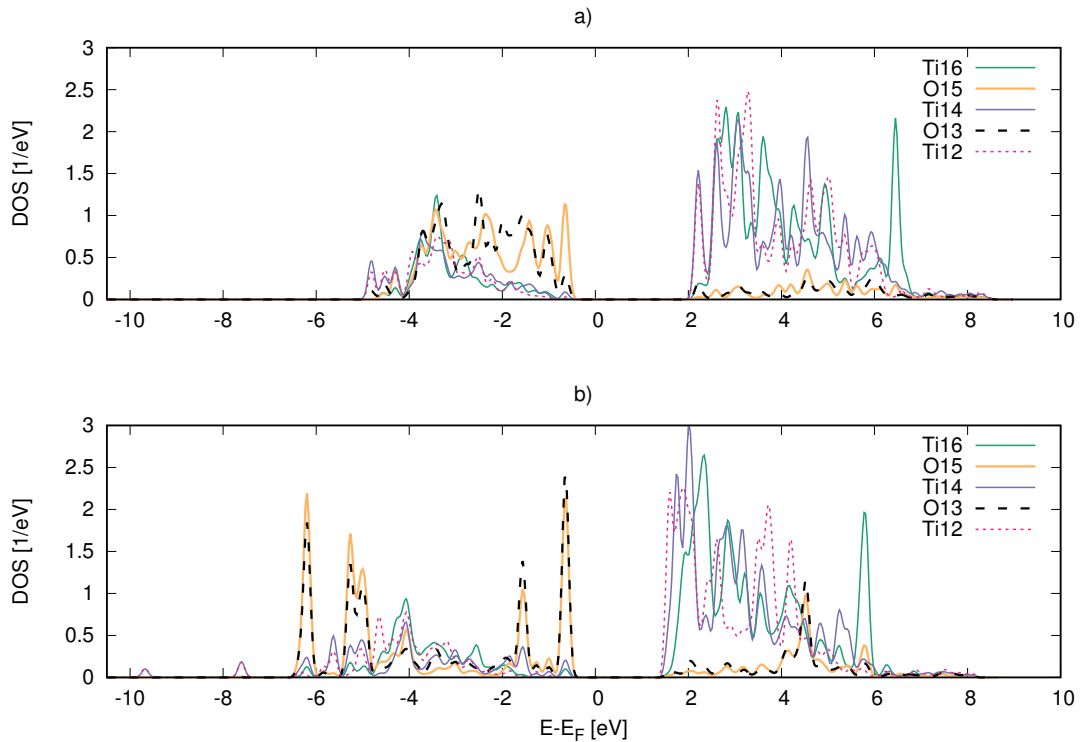

Figure S3: LDOS before (a) and after (b) the adsorption of 2  $\text{SO}_4$  groups for the p-orbitals of O atoms, forming O-O bond and the d-orbitals of neighboring Ti atoms. The atoms are emphasized in Fig. 1 f.

Table S2: Detailed electronic states for  $\text{Ti}_{16}\text{O}_{32}$  with 2  $\text{SO}_4$ 

| state/eV | atom and orbital       | comments                                                                      |
|----------|------------------------|-------------------------------------------------------------------------------|
| -9.666   | Ss, Ss                 |                                                                               |
| -7.598   | Sp, Sp                 |                                                                               |
| -6.264   | O6p-O7p, O15p-O13p     | O-O bonds                                                                     |
| -5.863   | Sp, Sp, O27p, O28p     | O: double bonded O atoms in the $\text{SO}_4$ groups                          |
| -5.630   | O21p, O22p             | O atoms between the titanium atoms to which $\text{SO}_4$ groups are attached |
| -5.063   | O23p, O24p, O21p, O22p |                                                                               |
| -0.643   | O13p, O7p, O15p, O6p   | HOMO level. O-O bonds                                                         |
| 1.577    | Ti8d, Ti12d            | LUMO level. Ti atoms, to which different $\text{SO}_4$ groups are attached    |

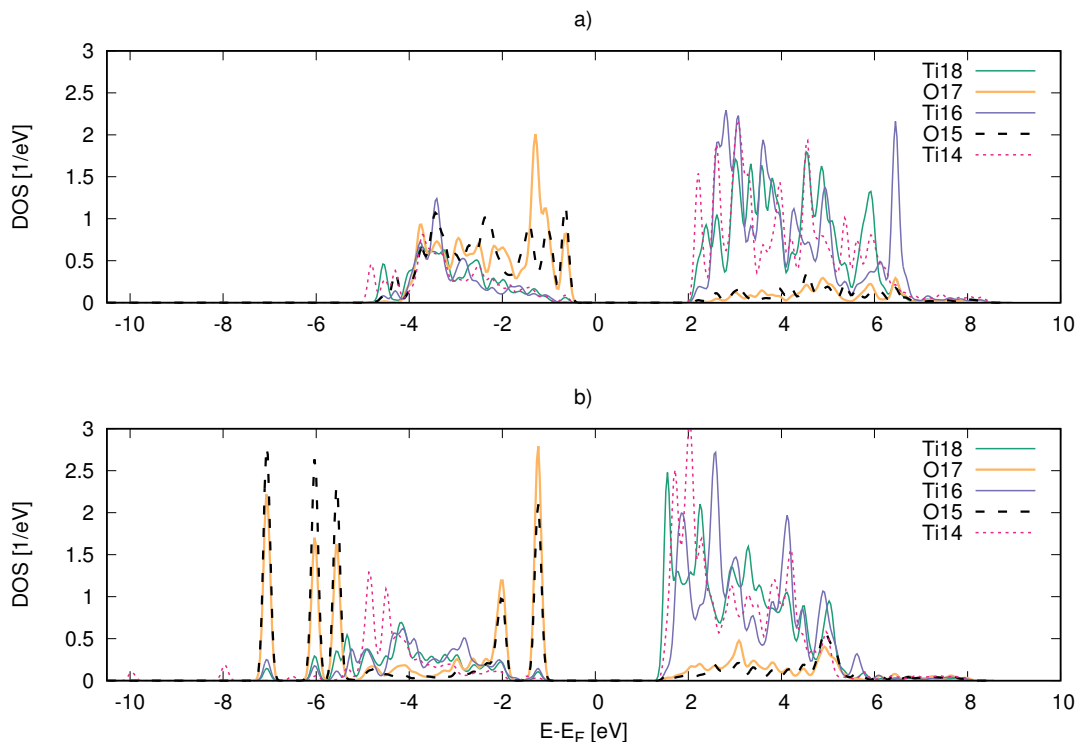
 Figure S4: LDOS before (a) and after (b) the adsorption of 3  $\text{SO}_4$  groups for the p-orbitals of O atoms, forming O-O bond and the d-orbitals of neighboring Ti atoms. The atoms are emphasized in Fig. 1 i.

 Table S3: Detailed electronic states for  $\text{Ti}_{16}\text{O}_{32}$  with 3  $\text{SO}_4$ 

| state/eV | atom and orbital                | comments                                                               |
|----------|---------------------------------|------------------------------------------------------------------------|
| -9.948   | Ss from $\text{SO}_4$ #1 and #3 |                                                                        |
| -9.714   | Ss from $\text{SO}_4$ #2        |                                                                        |
| -7.943   | Sp from $\text{SO}_4$ #1        |                                                                        |
| -7.742   | Sp from $\text{SO}_4$ #2        |                                                                        |
| -7.375   | O6p-O7p                         | $\eta^2$ -O <sub>2</sub>                                               |
| -7.074   | O15p-O17p                       | O-O bond (Fig. 1 i, Fig. S4)                                           |
| -6.539   | Sp from $\text{SO}_4$ #1 and #2 |                                                                        |
| -6.038   | O15p                            | the O atom from O-O bond                                               |
| -5.570   | O15p                            | the O atom from O-O bond                                               |
| -5.302   | O22p                            | Atom between the Ti atoms, to which $\text{SO}_4$ #3 group is attached |
| -1.190   | O7p-O6p, O17p                   | HOMO level. $\eta^2$ -O <sub>2</sub> and the O from O-O bond           |
| -1.167   | O6p-O7p                         | LUMO level. $\eta^2$ -O <sub>2</sub>                                   |
| 1.551    | Ti18d                           | Ti atom, to which O15-O17 is connected                                 |

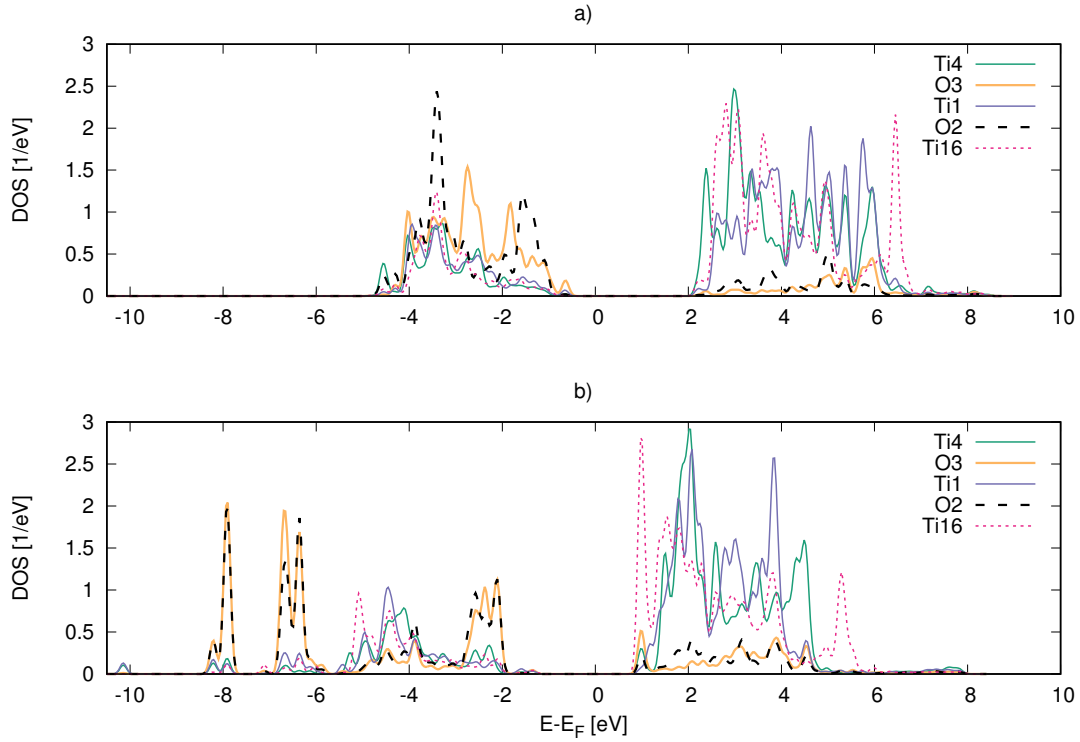

Figure S5: LDOS before (a) and after (b) the adsorption of 4  $\text{SO}_4$  groups for the p-orbitals of O atoms, forming O-O bond and the d-orbitals of neighboring Ti atoms. The atoms are emphasized in Fig. 1 j.

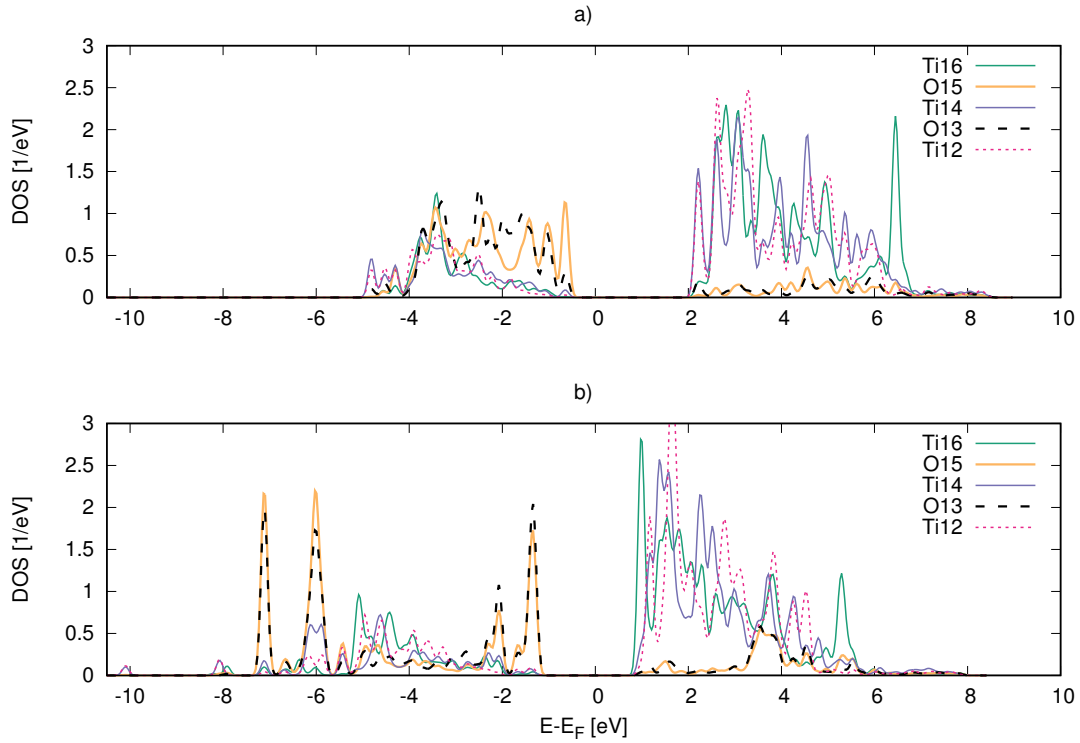

Figure S6: LDOS before (a) and after (b) the adsorption of 4  $\text{SO}_4$  groups for the p-orbitals of O atoms, forming O-O bond and the d-orbitals of neighboring Ti atoms. The atoms are emphasized in Fig. 1 l.

Table S4: Detailed electronic states for  $\text{Ti}_{16}\text{O}_{32}$  with 4  $\text{SO}_4$ 

| state/eV | atom and orbital                      | comments                                                                                         |
|----------|---------------------------------------|--------------------------------------------------------------------------------------------------|
| -10.079  | Ss from $\text{SO}_4$ #1, #3, #4      |                                                                                                  |
| -8.036   | Sp from $\text{SO}_4$ #3 and #4       |                                                                                                  |
| -7.433   | O9p-O6p                               | $\eta^2\text{-O}_2$                                                                              |
| -7.132   | O15p-O13p                             | O-O bond (Fig. 1 1, Fig. S6)                                                                     |
| -6.663   | Ti1p, O3p, Sp from $\text{SO}_4$ #1-4 | Ti: one of the atoms to which the $\text{SO}_4$ #2 is attached, connects to O2-O3 bond (Fig. S5) |
| -6.127   | Ti14p                                 |                                                                                                  |
| -5.424   | O21p                                  | O between Ti atoms, to which $\text{SO}_4$ #1 is attached                                        |
| -1.320   | O9p-O6p                               | HOMO level. $\eta^2\text{-O}_2$                                                                  |
| -1.274   | O9p-O6p                               | LUMO level. $\eta^2\text{-O}_2$                                                                  |
| 0.978    | Ti16d                                 | Ti atom, to which O2-O3 is connected                                                             |
